# Supplementary material for: Division of Labor, Bet Hedging, and the Evolution of Mixed Biofilm Investment Strategies
Source: PubMed Central journal article supplement (PMC5550747; doi:10.1128/mbio.00672-17), 2017-08-08

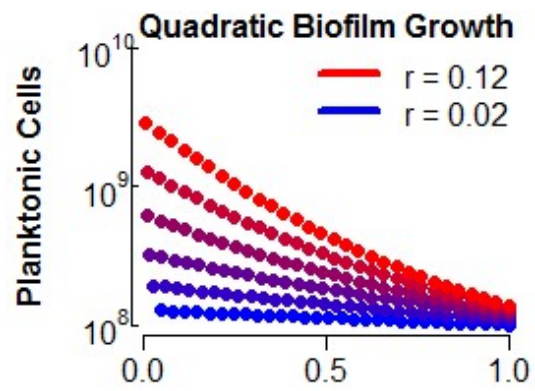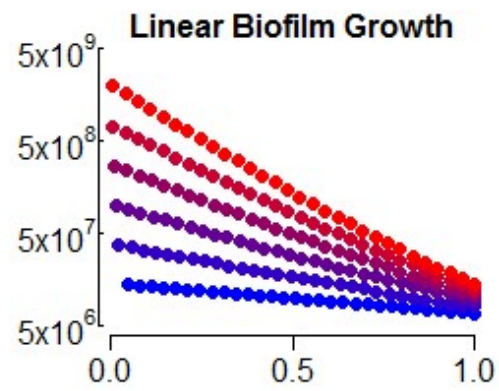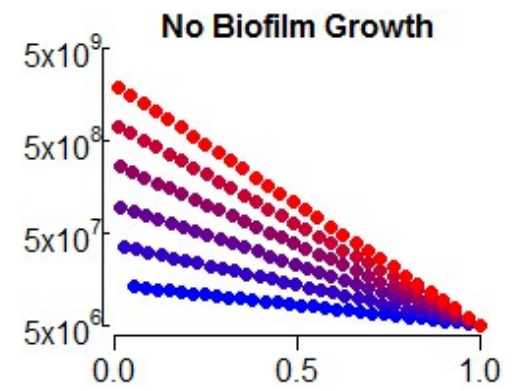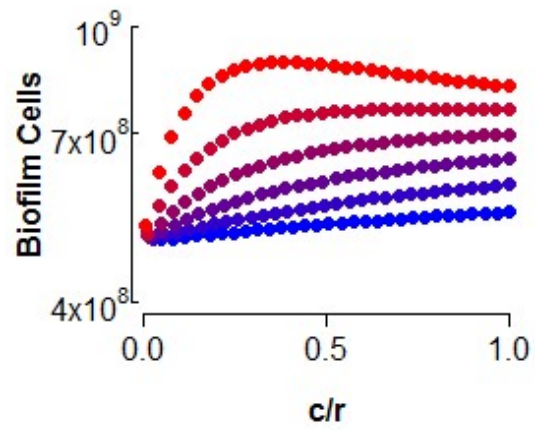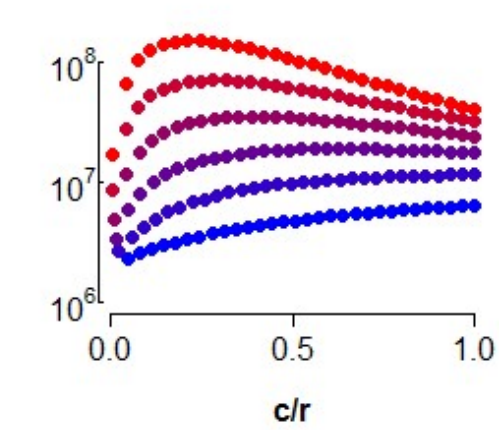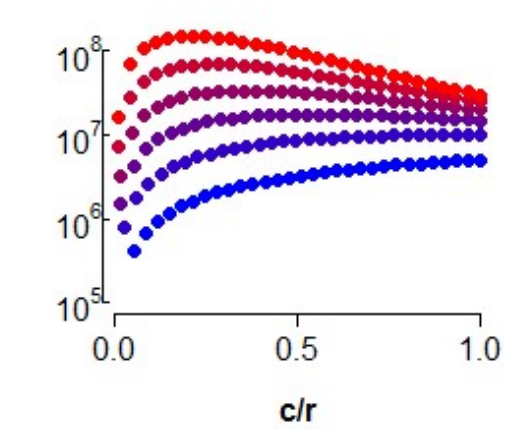

Supplement: mbo004173415sf1.pdf [file mbo004173415sf1.pdf]
